# Supplementary material
Source: PubMed Central journal article supplement (PMC3416394)
Supplement: AEM.00617-12_zam999103449so1.pdf [file AEM.00617-12_zam999103449so1.pdf]

## REFERENCES

1. **Carter MQ, Louie JW, Fagerquist CK, Sultan O, Miller WG, Mandrell RE.** 2012. Evolutionary Silence of the Acid Chaperone Protein HdeB in Enterohemorrhagic *Escherichia coli* O157:H7. *Appl. Environ. Microbiol.* **78**:1004-1014.
2. **Perna NT, Plunkett G, 3rd, Burland V, Mau B, Glasner JD, Rose DJ, Mayhew GF, Evans PS, Gregor J, Kirkpatrick HA, Posfai G, Hackett J, Klink S, Boutin A, Shao Y, Miller L, Grotbeck EJ, Davis NW, Lim A, Dimalanta ET, Potamouisis KD, Apodaca J, Anantharaman TS, Lin J, Yen G, Schwartz DC, Welch RA, Blattner FR.** 2001. Genome sequence of enterohaemorrhagic *Escherichia coli* O157:H7. *Nature* **409**:529-533.
3. **Zhou Z, Li X, Liu B, Beutin L, Xu J, Ren Y, Feng L, Lan R, Reeves PR, Wang L.** 2010. Derivation of *Escherichia coli* O157:H7 from its O55:H7 precursor. *PLoS One* **5**:e8700.

TABLE S1 Primers used in this study

| Primer         | Sequence 5' - 3'             |
|----------------|------------------------------|
| espA-Fw        | CGGCACAAAAGATGGCTAATC        |
| espA-Rv        | ACCAGCGCTTAAATCACCAC         |
| hdeA-BglIII-rv | AGATCTATCTTCACAGGTCCAGGAG    |
| hdeA-EMSA2-fw  | GCATCTCCAGATCAAACCTT         |
| hdeA-EMSA2-rv  | GTAATATCCTCAACTATAA          |
| hdeA-EMSAc-fw  | GACCTGTGAAGATTTCTCTG         |
| hdeA-EMSAc-rv  | GTCCCATTCGCCTTTAACT          |
| hdeA-Fw        | TGCAGTTGGTTTTGCTGAAG         |
| hdeA-lacZ1-fw  | CTGCAGTTCCATCAACATGACATATAC  |
| hdeA-lacZ2-fw  | CTGCAGAGTCGATTTAATAAAAATTTCC |
| hdeA-lacZ3-fw  | CTGCAGGCATCTCCAGATCAAACCTT   |
| hdeA-PstI-fw   | CTGCAGTAATACCGGCCAGAAATTATG  |
| hdeA-Rv        | TTGTCCCATTCGCCTTTAAC         |
| ICCrrsB-FRT    | CAGAGATGCGGTTGTGCCTTCGG      |
| ICCrrsB-RRT    | CCGCTGGCAACAAAGGATAAGG       |
| pKD4.F         | TGTGTAGGCTGGAGCTGCTTC        |
| pKD4.R         | CATATGAATATCCTCCTTAG         |
| pKD4seq.F      | TGACGAGTTCTTCTGAGCGGGAC      |
| pKD4seq.R      | TCTAGCTATCGCCATGTAAGCC       |
| slp-qPCR-fw    | TTGCAGCATGTAGTTCAATTCC       |
| slp-qPCR-rv    | TAACGTTGATAACCTTCCCACC       |
| Stx1.F         | GTATTGCAGGATGACCCTGTAACG     |

Table S1 (cont.)

|                  |                                                        |
|------------------|--------------------------------------------------------|
| Stx1.R           | GCATCAGCAAGGTCTGACGG                                   |
| Stx1CK.F         | CTAAGGAGGATATTCATATGGTGTCGTTGACTTAGA<br>ATAGCTCAGTG    |
| Stx1CK.R         | GAAGCAGCTCCAGCCTACACATTCAGCGAATCTACA<br>TACGTCTTTGC    |
| Stx1seq.F        | GGTGCGACCACAATTAATAAC                                  |
| Stx1seq.R        | CGCCTGAATAAGTGCTGCG                                    |
| Stx2.F           | TAGCTCAGTGGTGAGAGCGAGC                                 |
| Stx2.R           | AATGCCATGAATCCTCCCGG                                   |
| Stx2CK.F         | CTAAGGAGGATATTCATATGGTGAATGACTGAGGCA<br>TAACCTGATTCG   |
| Stx2CK.R         | GAAGCAGCTCCAGCCTACACACGAAGAGACATAACT<br>TTGTTGGGTCG    |
| Stx2seq.F        | CAGACGGTCAGGGAAGTTCAG                                  |
| Stx2seq.R        | CGAAATCAGCGCACTACCATAAG                                |
| Z0321.F          | CTACAAAGCTGCCGCAAAGTTGG                                |
| Z0321.R          | CGACAGTGCAGGATGTCATGTTAGG                              |
| Z0321CK.F        | CTAAGGAGGATATTCATATGATTCTTACTCACCAGG<br>GAATCTGATCATTG |
| Z0321CK.R        | GAAGCAGCTCCAGCCTACACATGCCATATCATCCCC<br>CCAATTTAACTG   |
| Z0321Fw-HindIII  | AAGCTTCAATCGTAGAATATTCTTGAAG                           |
| Z0321MBPFw-BamHI | GGATCCATGGCAACTACATGTTTCAGTT                           |

Table S1 (cont.)

|                    |                                                      |
|--------------------|------------------------------------------------------|
| Z0321MBPRv-HindIII | AAGCTTTCAGATTCCTGGTGAGTAAG                           |
| Z0321Rv-BamHI      | GGATCCGCTGAACATGTAGTTGCCATAT                         |
| Z0321Rv2-BamHI     | GGATCCTTGCATAATCTTGCAGTGGC                           |
| Z0321seq.F         | CTTATCTCCCGACTTCCCGTCTTGC                            |
| Z0321seq.R         | CACGACTTCTCCAGCATGCATAACC                            |
| Z1789.F            | GTAGCGCAGTGCGTTAAATGTGCTGG                           |
| Z1789.R            | GGTGAATTCAGTACCAGCACCTGAATC                          |
| Z1789CK.F          | CTAAGGAGGATATTCATATGTATGGCTTCCCGCCAG<br>ACAGATATG    |
| Z1789CK.R          | GAAGCAGCTCCAGCCTACACAGCAAACCATGATAAC<br>TGAACAGACAAC |
| Z1789Fw-HindIII    | AAGCTTTAAAAAATCAGGTATGCTGTAA                         |
| Z1789Rv-BamHI      | GGATCCGCTGAACAGACAACAACCATTA                         |
| Z1789seq.F         | GGTTATTTGCGCCGCATAGCTTGAC                            |
| Z1789seq.R         | GAGAGTGGCGCTATGTGCCATTG                              |
| Z2104-FW           | CTTCGCAAAGCTGTACCGC                                  |
| Z2104-RV           | GTTAATCACCACCTGTGCCAGATC                             |
| Z2104Fw-HindIII    | AAGCTTCTTCGCAAAGCTGTACCGC                            |
| Z2104Rv-BamHI      | GGATCCGCTGAACAGACAACAGCCATTATAAT                     |
| Z2104seq.F         | GTACAAACCAATGGTTATGGCT                               |
| Z2104seq.R         | TAAACGCGTACAGCGCAGG                                  |

---

TABLE S2 Description and BLASTp analysis of Z0321, Z1789 and Z2104 proteins

| ORF <sup>a</sup> | Length of protein (aa <sup>b</sup> ) | Molecular weight (kDa) | Comparison    | % Similarity |
|------------------|--------------------------------------|------------------------|---------------|--------------|
| <i>z0321</i>     | 247                                  | 28.18                  | Z0321 – Z1789 | 58%          |
|                  |                                      |                        | Z0321 – Z2104 | 59%          |
| <i>z1789</i>     | 237                                  | 26.83                  | Z1789 – Z2104 | 94%          |
|                  |                                      |                        | <i>z2104</i>  | 237          |

<sup>a</sup> ORF, open reading frame

<sup>b</sup> aa, amino acid
